# Supplementary material for: Who We Seek and What We Eat? Sources of Food Choice Inspirations and Their Associations with Adult Dietary Patterns before and during the COVID-19 Lockdown in New Zealand
Source: MDPI journal article supplement (doi:10.3390/nu13113917), 2021-11-01

## Supplementary Files

**Supplementary Table S1:** Survey questions and response options for determining the variables of food and cooking-related advice sought and reasons for recipe selection.

| When you do grocery shopping, you make choices, and these choices can also be influenced by others (indirectly). How often did the following people/sources influence your usual food choices when you went grocery shopping? Before Lockdown and During Lockdown | Response Options                                                                                  |
|-------------------------------------------------------------------------------------------------------------------------------------------------------------------------------------------------------------------------------------------------------------------|---------------------------------------------------------------------------------------------------|
| Household members                                                                                                                                                                                                                                                 | Never, Very Rarely, Rarely, Sometimes, Frequently, Very Frequently, or Every time I prepared food |
| Family                                                                                                                                                                                                                                                            | Never, Very Rarely, Rarely, Sometimes, Frequently, Very Frequently, or Every time I prepared food |
| Friends/acquaintances                                                                                                                                                                                                                                             | Never, Very Rarely, Rarely, Sometimes, Frequently, Very Frequently, or Every time I prepared food |
| Food advertisements/marketing                                                                                                                                                                                                                                     | Never, Very Rarely, Rarely, Sometimes, Frequently, Very Frequently, or Every time I prepared food |
| Celebrity chefs                                                                                                                                                                                                                                                   | Never, Very Rarely, Rarely, Sometimes, Frequently, Very Frequently, or Every time I prepared food |
| Other celebrities                                                                                                                                                                                                                                                 | Never, Very Rarely, Rarely, Sometimes, Frequently, Very Frequently, or Every time I prepared food |
| Food influencers (not chefs either, people that generate food content via any medium to reach and engage with their followers)                                                                                                                                    | Never, Very Rarely, Rarely, Sometimes, Frequently, Very Frequently, or Every time I prepared food |
| Other                                                                                                                                                                                                                                                             | Never, Very Rarely, Rarely, Sometimes, Frequently, Very Frequently, or Every time I prepared food |
| Whose advice about the sorts of food you should eat for your health did you listen to? Before Lockdown and During Lockdown                                                                                                                                        | Response Options                                                                                  |

## Supplementary Files

|                                                                                                                                                                                   |                                                                                                             |
|-----------------------------------------------------------------------------------------------------------------------------------------------------------------------------------|-------------------------------------------------------------------------------------------------------------|
| Household members                                                                                                                                                                 | Never, Very Rarely, Rarely, Sometimes, Frequently, Very Frequently, or Every time I needed or wanted advice |
| Family                                                                                                                                                                            | Never, Very Rarely, Rarely, Sometimes, Frequently, Very Frequently, or Every time I needed or wanted advice |
| Friends and acquaintances                                                                                                                                                         | Never, Very Rarely, Rarely, Sometimes, Frequently, Very Frequently, or Every time I needed or wanted advice |
| Nutrition experts (dietitians or nutritionists)                                                                                                                                   | Never, Very Rarely, Rarely, Sometimes, Frequently, Very Frequently, or Every time I needed or wanted advice |
| Health experts (medical doctors)                                                                                                                                                  | Never, Very Rarely, Rarely, Sometimes, Frequently, Very Frequently, or Every time I needed or wanted advice |
| Scientists                                                                                                                                                                        | Never, Very Rarely, Rarely, Sometimes, Frequently, Very Frequently, or Every time I needed or wanted advice |
| Celebrity Chefs                                                                                                                                                                   | Never, Very Rarely, Rarely, Sometimes, Frequently, Very Frequently, or Every time I needed or wanted advice |
| Food influencers (not chefs either, people that generate food content via any medium to reach and engage with their followers)                                                    | Never, Very Rarely, Rarely, Sometimes, Frequently, Very Frequently, or Every time I needed or wanted advice |
| Other people                                                                                                                                                                      | Never, Very Rarely, Rarely, Sometimes, Frequently, Very Frequently, or Every time I needed or wanted advice |
| There are many recipes and food preparation messages available to us. How often did you actively search for recipes/food preparation content? Before Lockdown and During Lockdown | Never, Very Rarely, Rarely, Sometimes, Frequently, Very Frequently, or All the time                         |
| <b>When you select recipes, which of the following things do you take into consideration? Before Lockdown and During Lockdown</b>                                                 | <b>Response Options</b>                                                                                     |

## Supplementary Files

|                                                                   |                                                                                                                      |
|-------------------------------------------------------------------|----------------------------------------------------------------------------------------------------------------------|
| Guaranteed to taste good                                          | Strongly disagree, disagree, somewhat disagree, neither agree nor disagree, somewhat agree, agree, or strongly agree |
| Achievable with few ingredients                                   | Strongly disagree, disagree, somewhat disagree, neither agree nor disagree, somewhat agree, agree, or strongly agree |
| Achievable with the ingredients I have at home                    | Strongly disagree, disagree, somewhat disagree, neither agree nor disagree, somewhat agree, agree, or strongly agree |
| Achievable with ingredients that can be easily found at the store | Strongly disagree, disagree, somewhat disagree, neither agree nor disagree, somewhat agree, agree, or strongly agree |
| Easy to prepare                                                   | Strongly disagree, disagree, somewhat disagree, neither agree nor disagree, somewhat agree, agree, or strongly agree |
| Quick to prepare                                                  | Strongly disagree, disagree, somewhat disagree, neither agree nor disagree, somewhat agree, agree, or strongly agree |
| Innovative (new, something different)                             | Strongly disagree, disagree, somewhat disagree, neither agree nor disagree, somewhat agree, agree, or strongly agree |
| Inexpensive to make                                               | Strongly disagree, disagree, somewhat disagree, neither agree nor disagree, somewhat agree, agree, or strongly agree |
| Comforting                                                        | Strongly disagree, disagree, somewhat disagree, neither agree nor disagree, somewhat agree, agree, or strongly agree |
| Healthy                                                           | Strongly disagree, disagree, somewhat disagree, neither agree nor disagree, somewhat agree, agree, or strongly agree |
| Environmentally friendly                                          | Strongly disagree, disagree, somewhat disagree, neither                                                              |

## Supplementary Files

|                                                                                                                                                 |                                                                                                                      |
|-------------------------------------------------------------------------------------------------------------------------------------------------|----------------------------------------------------------------------------------------------------------------------|
|                                                                                                                                                 | agree nor disagree, somewhat agree, agree, or strongly agree                                                         |
| <b>Name your top food-related influential figure, organization or brand whose recipes you use the most. Before Lockdown and During Lockdown</b> | <b>Free text box</b>                                                                                                 |
| <b>Now rate this person/organization/brand on the following criteria. Before Lockdown and During Lockdown</b>                                   | <b>Response Options</b>                                                                                              |
| He/she/it was trustworthy                                                                                                                       | Strongly disagree, disagree, somewhat disagree, neither agree nor disagree, somewhat agree, agree, or strongly agree |
| He/she/it was an expert                                                                                                                         | Strongly disagree, disagree, somewhat disagree, neither agree nor disagree, somewhat agree, agree, or strongly agree |
| He/she/it was relatable                                                                                                                         | Strongly disagree, disagree, somewhat disagree, neither agree nor disagree, somewhat agree, agree, or strongly agree |

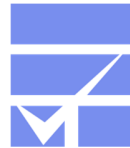

**Supplementary Figure S1:** CONSORT 2010 Flow Diagram

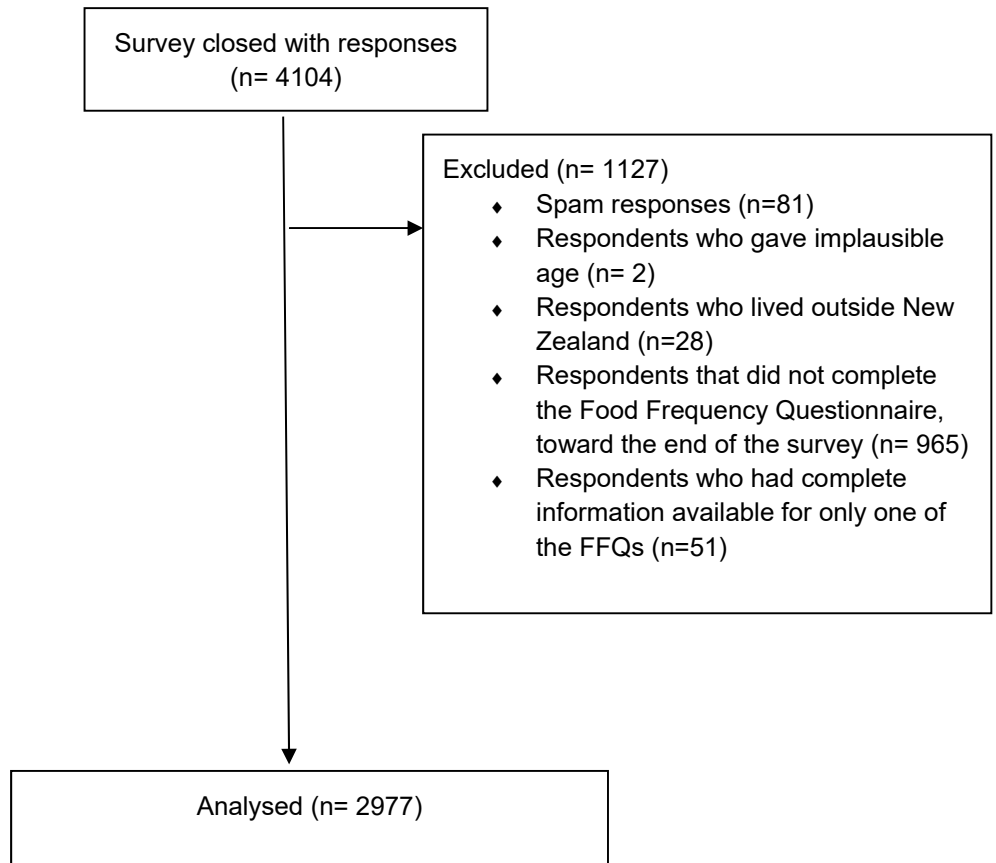

Supplement: s1 [file s1]
